# Supplementary material
Source: PubMed Central journal article supplement (PMC5322227)
Supplement: NIHMS794617-supplement-Supplemental_Digital_Content.pdf [file NIHMS794617-supplement-Supplemental_Digital_Content.pdf]

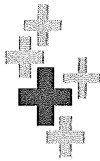

# CARE Checklist (2013) of information to include when writing a case report

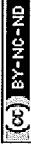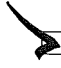

| Topic                    | Item | Checklist item description                                                                            | Reported on Page                                                    |
|--------------------------|------|-------------------------------------------------------------------------------------------------------|---------------------------------------------------------------------|
| Title                    | 1    | The words "case report" should be in the title along with the area of focus.                          | 1                                                                   |
|                          | 2    | 2 to 5 key words that identify areas covered in this case report.                                     | 2                                                                   |
| Abstract                 | 3a   | Introduction—What is unique about this case? What does it add to the medical literature?              | 3                                                                   |
|                          | 3b   | The main symptoms of the patient and the important clinical findings.                                 | 4-5                                                                 |
|                          | 3c   | The main diagnoses, therapeutics interventions, and outcomes.                                         | 5                                                                   |
| Introduction             | 3d   | Conclusion—What are the main "take-away" lessons from this case?                                      | 6                                                                   |
|                          | 4    | One or two paragraphs summarizing why this case is unique with references                             | 6-7                                                                 |
| Patient Information      | 5a   | De-identified demographic information and other patient specific information                          | 4                                                                   |
|                          | 5b   | Main concerns and symptoms of the patient                                                             | 4-5                                                                 |
|                          | 5c   | Medical, family, and psychosocial history including relevant genetic information (also see timeline). | 4                                                                   |
|                          | 5d   | Relevant past interventions and their outcomes                                                        | n/a                                                                 |
|                          | 6    | Describe the relevant physical examination (PE) and other significant clinical findings.              | 5                                                                   |
| Clinical Findings        | 7    | Important information from the patient's history organized as a timeline                              | 4-5                                                                 |
|                          | 8a   | Diagnostic methods (such as PE, laboratory testing, imaging, surveys).                                | 5                                                                   |
|                          | 8b   | Diagnostic challenges (such as access, financial, or cultural)                                        | n/a                                                                 |
|                          | 8c   | Diagnostic reasoning including other diagnoses considered                                             | 6-7                                                                 |
| Therapeutic Intervention | 8d   | Prognostic characteristics (such as staging in oncology) where applicable                             | n/a                                                                 |
|                          | 9a   | Types of intervention (such as pharmacologic, surgical, preventive, self-care)                        | 5-6                                                                 |
|                          | 9b   | Administration of intervention (such as dosage, strength, duration)                                   | 5-6                                                                 |
|                          | 9c   | Changes in intervention (with rationale)                                                              | n/a                                                                 |
| Follow-up and Outcomes   | 10a  | Clinician and patient-assessed outcomes (when appropriate)                                            | 5-6                                                                 |
|                          | 10b  | Important follow-up diagnostic and other test results                                                 | 6                                                                   |
|                          | 10c  | Intervention adherence and tolerability (How was this assessed?)                                      | 5-6                                                                 |
| Discussion               | 10d  | Adverse and unanticipated events                                                                      | n/a                                                                 |
|                          | 11a  | Discussion of the strengths and limitations in your approach to this case                             | 6-7                                                                 |
|                          | 11b  | Discussion of the relevant medical literature.                                                        | 6-7                                                                 |
|                          | 11c  | The rationale for conclusions (including assessment of possible causes)                               | 7-8                                                                 |
| Patient Perspective      | 11d  | The primary "take-away" lessons of this case report.                                                  | 7-8                                                                 |
|                          | 12   | When appropriate the patient should share their perspective on the treatments they received           | 5-6                                                                 |
| Informed Consent         | 13   | Did the patient give informed consent? Please provide if requested                                    | Yes <input checked="" type="checkbox"/> No <input type="checkbox"/> |
